# Supplementary material for: Identification of Novel AXL Kinase Inhibitors Using Ligand-Based Pharmacophore Screening and Molecular Dynamics Simulations
Source: MDPI journal article supplement (doi:10.3390/cryst12081158), 2022-08-17
Supplement: s1 [file s1]

# Identification of Novel AXL Kinase Inhibitors Using Ligand-Based Pharmacophore Screening and Molecular Dynamics Simulations

Lavanya Nagamalla <sup>1,2</sup>, J. V. Shanmukha Kumar <sup>1,\*</sup>, Mohammed Rafi Shaik <sup>3</sup>, Chintakindi Sanjay <sup>4,\*</sup>, Ali M Alsamhan <sup>4</sup>, Mohsin Ahmed Kasim <sup>4</sup> and Abdulrahman Alwarthan <sup>3</sup>

<sup>1</sup> Department of Engineering Chemistry, College of Engineering, Koneru Lakshmaiah Education Foundation, Vaddeswaram, AP, India; lavanya.sereno@gmail.com (L.N.)

<sup>2</sup> Hyderabad Institute of Technology and Management, Medchal, Hyderabad, Telangana, India.

<sup>3</sup> Department of Chemistry, College of Science, King Saud University, P.O. Box 2455, Riyadh 11451, Saudi Arabia; mrshaik@ksu.edu.sa (M.R.S.); awarthan@ksu.edu.sa (A.A.)

<sup>4</sup> Industrial Engineering Department, College of Engineering, King Saud University, P.O. Box. 800, Riyadh 11451, Saudi Arabia; asamhan@ksu.edu.sa (A.M.A.); 441106540@ksu.edu.sa (M.A.K.)

\* Correspondence: shanmukh\_fed@kluniversity.in (J.V.S.K.); schintakindi@ksu.edu.sa (C.S.).

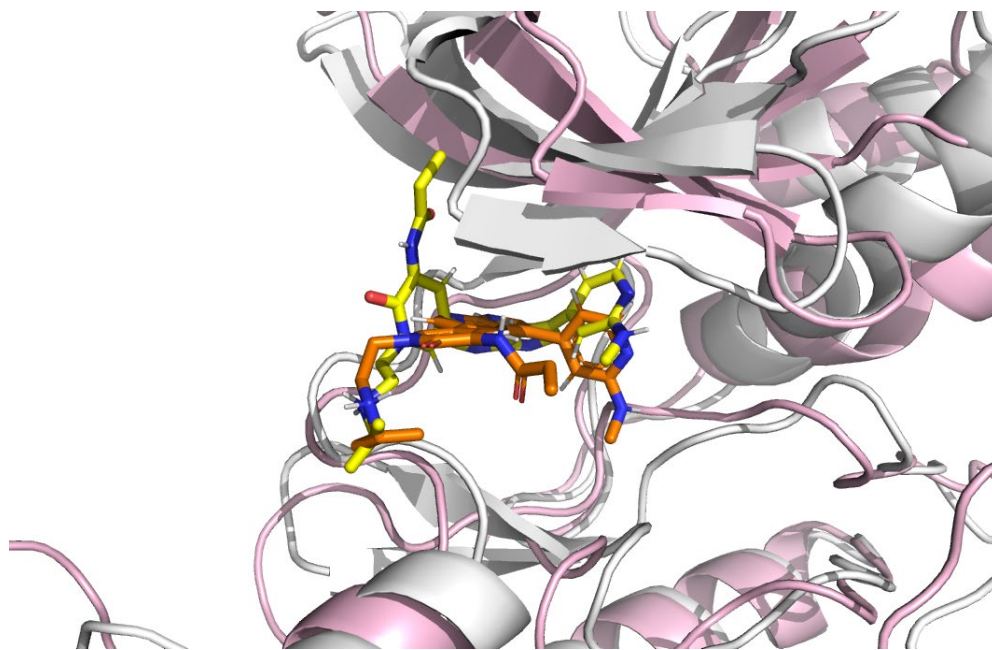

**Figure S1:** Structural alignment of PubChem-122421875 molecule complex docking (white) and representative conformation (light pink) of stable structures of last 5 nano seconds of total 100 nano seconds of Molecular dynamics simulations. The docking molecule is shown in orange sticks and the simulations out molecule shown in yellow sticks.

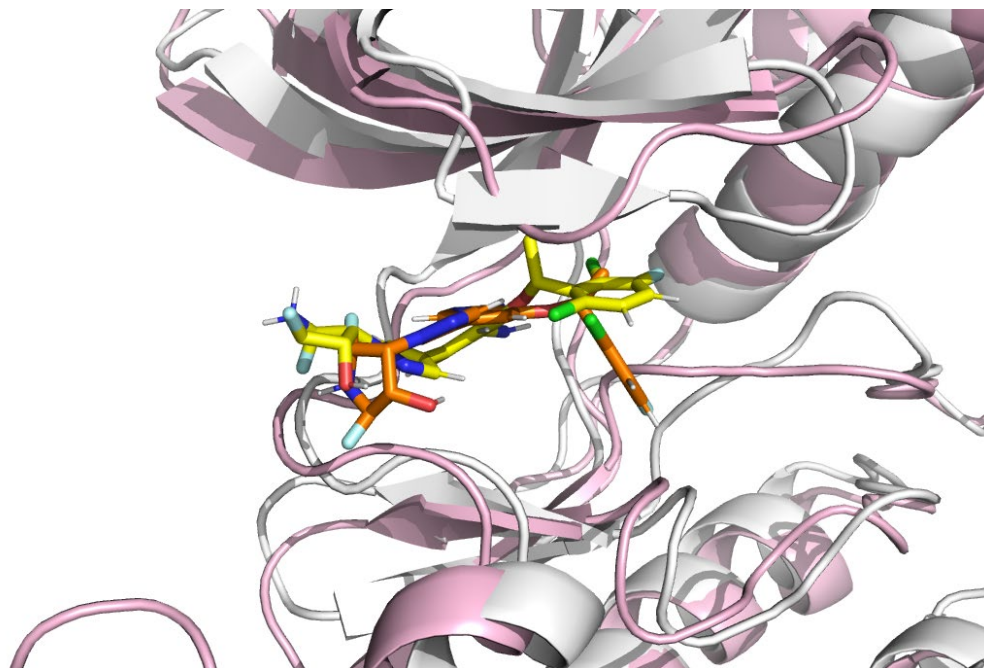

**Figure S2:** Structural alignment of PubChem-78160848 molecule complex docking (white) and representative conformation (light pink) of stable structures of last 5 nano seconds of total 100 nano seconds of Molecular dynamics simulations. The docking molecule is shown in orange sticks and the simulations out molecule shown in yellow sticks.

**Table S1:** Top 100 molecules selected from virtual screening of 408 molecules set into the AXL active site. Binding energies are shown in kcal/mol.

| S.No | Molecule         | Binding Energy |
|------|------------------|----------------|
| 1    | PubChem-86622644 | -9.1           |
| 2    | PubChem-87083194 | -8.3           |
| 3    | PubChem-78160848 | -8.3           |
| 4    | PubChem-54673081 | -8.3           |
| 5    | PubChem-59105506 | -8.3           |
| 6    | PubChem-87624595 | -8.3           |
| 7    | PubChem-91161419 | -8.3           |
| 8    | PubChem-68651527 | -8.3           |
| 9    | PubChem-68651279 | -8.3           |
| 10   | PubChem-59496934 | -8.3           |

|    |                   |      |
|----|-------------------|------|
| 11 | PubChem-86647548  | -8.2 |
| 12 | PubChem-68650592  | -8.2 |
| 13 | PubChem-76973938  | -8.2 |
| 14 | PubChem-68651815  | -8.2 |
| 15 | PubChem-68651884  | -8.2 |
| 16 | PubChem-87130086  | -8.2 |
| 17 | PubChem-68651864  | -8.2 |
| 18 | PubChem-68650778  | -8.2 |
| 19 | PubChem-46215820  | -8.2 |
| 20 | PubChem-67095038  | -8.2 |
| 21 | PubChem-91571058  | -8.2 |
| 22 | PubChem-59291637  | -8.2 |
| 23 | PubChem-68651547  | -8.2 |
| 24 | PubChem-71726787  | -8.2 |
| 25 | PubChem-86622836  | -8.2 |
| 26 | PubChem-68652004  | -8.2 |
| 27 | PubChem-118893848 | -8.2 |
| 28 | PubChem-11487431  | -8.1 |
| 29 | PubChem-123758792 | -8.1 |
| 30 | PubChem-90805470  | -8.1 |
| 31 | PubChem-67363082  | -8.1 |
| 32 | PubChem-87238440  | -8.1 |
| 33 | PubChem-57974178  | -8.1 |
| 34 | PubChem-122421875 | -8.1 |
| 35 | PubChem-24771111  | -8.1 |
| 36 | PubChem-89770312  | -8.1 |

|    |                   |      |
|----|-------------------|------|
| 37 | PubChem-89770356  | -8.1 |
| 38 | PubChem-123781824 | -8.1 |
| 39 | PubChem-87689658  | -8.1 |
| 40 | PubChem-54674207  | -8.1 |
| 41 | PubChem-68650407  | -8.1 |
| 42 | PubChem-87636284  | -8.1 |
| 43 | PubChem-87240593  | -8.1 |
| 44 | PubChem-68650511  | -8.1 |
| 45 | PubChem-90028383  | -8   |
| 46 | PubChem-91026614  | -8   |
| 47 | PubChem-68651953  | -8   |
| 48 | PubChem-89254356  | -8   |
| 49 | PubChem-89254396  | -8   |
| 50 | PubChem-68651123  | -8   |
| 51 | PubChem-54674209  | -8   |
| 52 | PubChem-68651841  | -8   |
| 53 | PubChem-134203387 | -8   |
| 54 | PubChem-68650813  | -8   |
| 55 | PubChem-87240181  | -8   |
| 56 | PubChem-44454763  | -8   |
| 57 | PubChem-69043445  | -8   |
| 58 | PubChem-124099582 | -8   |
| 59 | PubChem-57463219  | -8   |
| 60 | PubChem-90163766  | -8   |
| 61 | PubChem-46241028  | -7.9 |
| 62 | PubChem-134203514 | -7.9 |

|    |                   |      |
|----|-------------------|------|
| 63 | PubChem-91230843  | -7.9 |
| 64 | PubChem-89254389  | -7.9 |
| 65 | PubChem-71727044  | -7.9 |
| 66 | PubChem-67364965  | -7.9 |
| 67 | PubChem-89254325  | -7.9 |
| 68 | PubChem-57928218  | -7.9 |
| 69 | PubChem-11516065  | -7.9 |
| 70 | PubChem-126726905 | -7.9 |
| 71 | PubChem-121494162 | -7.9 |
| 72 | PubChem-68650944  | -7.9 |
| 73 | PubChem-89254050  | -7.9 |
| 74 | PubChem-68651602  | -7.9 |
| 75 | PubChem-89254356  | -7.9 |
| 76 | PubChem-68651319  | -7.9 |
| 77 | PubChem-54674981  | -7.9 |
| 78 | PubChem-89254102  | -7.9 |
| 79 | PubChem-68651553  | -7.8 |
| 80 | PubChem-76167946  | -7.8 |
| 81 | PubChem-78160852  | -7.8 |
| 82 | PubChem-68651430  | -7.8 |
| 83 | PubChem-66830616  | -7.8 |
| 84 | PubChem-86643676  | -7.8 |
| 85 | PubChem-89254010  | -7.8 |
| 86 | PubChem-123546428 | -7.8 |
| 87 | PubChem-25224351  | -7.8 |
| 88 | PubChem-68651927  | -7.8 |

|     |                   |      |
|-----|-------------------|------|
| 89  | PubChem-87659671  | -7.8 |
| 90  | PubChem-50996689  | -7.8 |
| 91  | PubChem-89254052  | -7.8 |
| 92  | PubChem-71727607  | -7.7 |
| 93  | PubChem-127040635 | -7.7 |
| 94  | PubChem-68650375  | -7.7 |
| 95  | PubChem-87945151  | -7.7 |
| 96  | PubChem-68651653  | -7.7 |
| 97  | PubChem-68650645  | -7.7 |
| 98  | PubChem-69271388  | -7.7 |
| 99  | PubChem-68651266  | -7.7 |
| 100 | PubChem-87240187  | -7.7 |
